# Supplementary material for: Personalized early detection and prevention of breast cancer: ENVISION consensus statement
Source: PubMed Central journal article supplement (PMC7567644; doi:10.1038/s41571-020-0388-9), 2020-06-18
Supplement: 41571_2020_388_MOESM1_ESM.pdf [file 41571_2020_388_MOESM1_ESM.pdf]

# Personalized early detection and prevention of breast cancer: ENVISION consensus statement

*Nora Pashayan, Antonis C. Antoniou, Urska Ivanus, Laura J. Esserman, Douglas F. Easton, David French, Gaby Sroczynski, Per Hall, Jack Cuzick, D. Gareth Evans, Jacques Simard, Montserrat Garcia-Closas, Rita Schmutzler, Odette Wegwarth, Paul Pharoah, Sowmiya Moorthie, Sandrine De Montgolfier, Camille Baron, Zdenko Herceg, Clare Turnbull, Corinne Balleyguier, Paolo Giorgi Rossi, Jelle Wesseling, David Ritchie, Marc Tischkowitz, Mireille Broeders, Dan Reisel, Andres Metspalu, Thomas Callender, Harry de Koning, Peter Devilee, Suzette Delaloge, Marjanka K. Schmidt and Martin Widschwendter*

<https://doi.org/10.1038/s41571-020-0388-9>

Supplementary Table 1 | **Participants of the European Conference on Risk-Stratified Prevention and Early Detection of Breast Cancer, Hall in Tirol, Austria, 26—28 June 2019**

| Delegate                       | Affiliation                                                                                                                                                                                                                                                                                                                                                                 |
|--------------------------------|-----------------------------------------------------------------------------------------------------------------------------------------------------------------------------------------------------------------------------------------------------------------------------------------------------------------------------------------------------------------------------|
| Prof. Angel Carracedo Alvarez  | Center for Research in Molecular Medicine and Chronic Diseases (CiMUS), University of Santiago de Compostela, Santiago de Compostela, A Coruña, Spain.                                                                                                                                                                                                                      |
| Dr Nadine Andrieu              | Institut Curie, Paris, France.                                                                                                                                                                                                                                                                                                                                              |
| Prof. Antonis C. Antoniou      | Centre for Cancer Genetic Epidemiology, Department of Public Health and Primary Care, University of Cambridge, UK.                                                                                                                                                                                                                                                          |
| Dr Corinne Balleyguier         | Department Medical Imaging, Institut Gustave Roussy, Villejuif, France.                                                                                                                                                                                                                                                                                                     |
| Dr James Barrett               | Department of Women's Cancer, Institute for Women's Health, University College London, London, UK.                                                                                                                                                                                                                                                                          |
| Dr Camille Baron               | Unicancer, Paris, France.                                                                                                                                                                                                                                                                                                                                                   |
| Dr Julie Bennett               | Department of Women's Cancer, Institute for Women's Health, University College London, London, UK.                                                                                                                                                                                                                                                                          |
| Dr Proteeti Bhattacharjee      | Department of Molecular Pathology, Netherlands Cancer Institute, Antoni van Leeuwenhoek Hospital, Amsterdam, The Netherlands.                                                                                                                                                                                                                                               |
| Prof. Stig Bojesen             | Department of Clinical Medicine, Herlev-Gentofte Hospital, University of Copenhagen, Herlev, Denmark.                                                                                                                                                                                                                                                                       |
| Dr Ineke Bolt                  | Department of Medical Ethics and Philosophy of Medicine, Erasmus MC, Rotterdam, The Netherlands.                                                                                                                                                                                                                                                                            |
| Prof. Mireille Broeders        | Department for Health Evidence, Radboud University Medical Center, Nijmegen, The Netherlands.                                                                                                                                                                                                                                                                               |
| Mr Jeroen van de Broek         | Department of Public Health, Erasmus MC, Rotterdam, The Netherlands.                                                                                                                                                                                                                                                                                                        |
| Dr Jean Benoit Burrión         | Cancer Prevention and Screening, Medical general management, Quality unit, Institut Jules Bordet, Brussels, Belgium.                                                                                                                                                                                                                                                        |
| Dr Xavier Castells             | Laboratory of Translational Medicine and Decision Sciences (TransLab), Department of Medical Sciences, Medicine Faculty, Universitat de Girona, Girona, Spain.                                                                                                                                                                                                              |
| Dr Carlos Tarín Cerezo         | Department of Basic Medical Sciences, Universidad CEU San Pablo, Campus de Moncloa Calle Julián Romea, Madrid, Spain.                                                                                                                                                                                                                                                       |
| Prof. Jenny Chang-Claude       | Genetic Epidemiology Unit, Division of Cancer Epidemiology, German Cancer Research Center (DKFZ) Heidelberg, Medical Faculty, University of Heidelberg, Germany.                                                                                                                                                                                                            |
| Prof. Georgia Chenevix-Trench  | Cancer Genetics Laboratory, Department of Genetics and Computational Biology, Queensland Institute of Medical Research (QIMR) Berghofer, Brisbane, Australia.                                                                                                                                                                                                               |
| Prof. Anna Maria Chiarelli     | Dalla Lana School of Public Health, University of Toronto, Cancer Care Ontario, Toronto, Ontario, Canada.                                                                                                                                                                                                                                                                   |
| Dr Hans Concin                 | AKS Vorarlberg, Austria.                                                                                                                                                                                                                                                                                                                                                    |
| Prof. Jack Cuzick              | Wolfson Institute of Preventive Medicine, Barts and The London, Centre for Cancer Prevention, Queen Mary University of London, UK.                                                                                                                                                                                                                                          |
| Dr Kamila Czene                | Department of Medical Epidemiology and Biostatistics, Karolinska Institutet, Stockholm, Sweden.                                                                                                                                                                                                                                                                             |
| Dr Suzette Delalogue           | Breast Cancer Department, Gustave Roussy Institute, Paris, France.                                                                                                                                                                                                                                                                                                          |
| Prof. Peter Devilee            | Department of Human Genetics, Department of Pathology, Leiden University Medical Centre, Leiden, The Netherlands.                                                                                                                                                                                                                                                           |
| Dr Julia Dick                  | Center of Family Breast and Ovarian Cancer, University Hospital Cologne, Cologne, Germany.                                                                                                                                                                                                                                                                                  |
| Dr Alison Dunning              | Centre for Cancer Genetic Epidemiology, University of Cambridge, UK.                                                                                                                                                                                                                                                                                                        |
| Prof. Douglas F. Easton        | Centre for Cancer Genetic Epidemiology, Department of Public Health and Primary Care, University of Cambridge, UK.                                                                                                                                                                                                                                                          |
| Prof. Laurence Eloy            | Centre de recherche du CHU de Québec - Université Laval, CHUL, Québec, Canada.                                                                                                                                                                                                                                                                                              |
| Dr Christoph Engel             | Institute for Medical Informatics, Statistics and Epidemiology, University of Leipzig, Leipzig, Germany.                                                                                                                                                                                                                                                                    |
| Prof. Laura Esserman           | Carol Franc Buck Breast Care Center, University of California, San Francisco, San Francisco, CA, USA.                                                                                                                                                                                                                                                                       |
| Prof. Gareth Evans             | Division of Evolution & Genomic Sciences, University of Manchester, UK.                                                                                                                                                                                                                                                                                                     |
| Dr Iona Evans                  | Department of Women's Cancer, Institute for Women's Health, University College London, London, UK.                                                                                                                                                                                                                                                                          |
| Dr Mikael Eriksson             | Department of Physiology and Pharmacology, Karolinska Institutet, Stockholm, Sweden.                                                                                                                                                                                                                                                                                        |
| Dr Angelique Flöter-Rådestad   | Department of Women's and Children's Health, Karolinska Institutet, Stockholm, Sweden.                                                                                                                                                                                                                                                                                      |
| Prof. David French             | Division of Psychology & Mental Health, School of Social Sciences, University of Manchester, UK.                                                                                                                                                                                                                                                                            |
| Prof. Montserrat Garcia-Closas | Division of Cancer Epidemiology & Genetics, National Cancer Institute, Bethesda, Maryland, USA.                                                                                                                                                                                                                                                                             |
| Dr Emilien Gauthier            | Predilife, Villejuif, France.                                                                                                                                                                                                                                                                                                                                               |
| Prof. Fiona Gilbert            | Centre for Mathematical Imaging in Healthcare, University of Cambridge, UK.                                                                                                                                                                                                                                                                                                 |
| Prof. Carla van Gils           | Department of Epidemiology, UMC Utrecht, Division Julius Centrum, Utrecht, The Netherlands.                                                                                                                                                                                                                                                                                 |
| Dr Livia Giordano              | CPO Piemonte Referral Center for Epidemiology and Oncology Prevention in Piemonte, SSD Epidemiology Screening - CRPT, Torino, Italy.                                                                                                                                                                                                                                        |
| Dr Artemisa Gogollari          | Institute of Public Health, Medical Decision Making and Health Technology Assessment, Department of Public Health, Health Services Research and HTA, UMIT-University for Health Sciences, Medical Informatics and Technology, Hall in Tirol, Austria.<br>Division of Health Technology Assessment, ONCOTYROL - Center for Personalized Cancer Medicine, Innsbruck, Austria. |

|                              |                                                                                                                                                                                                                                                                                                                                                                             |
|------------------------------|-----------------------------------------------------------------------------------------------------------------------------------------------------------------------------------------------------------------------------------------------------------------------------------------------------------------------------------------------------------------------------|
| Dr Ewan Gray                 | Faculty of Biology, Medicine and Health, Manchester Centre for Health Economics (MCHE), University of Manchester, UK.                                                                                                                                                                                                                                                       |
| Dr Michal Guindy             | Assuta Medical Centers, Israel.                                                                                                                                                                                                                                                                                                                                             |
| Dr Ivo Gut                   | Centro Nacional de Análisis Genómico, Centre for Genomic Regulation (CNAG-CRG), Barcelona, Spain.                                                                                                                                                                                                                                                                           |
| Dr Kevin ten Haaf            | Department of Public Health, Erasmus MC, Rotterdam, The Netherlands.                                                                                                                                                                                                                                                                                                        |
| Prof. Per Hall               | Department of Medical Epidemiology and Biostatistics, Karolinska Institutet, Stockholm, Sweden.<br>Department of Oncology, Södersjukhuset, Stockholm, Sweden.                                                                                                                                                                                                               |
| Dr Lára Hallsson             | Institute of Public Health, Medical Decision Making and Health Technology Assessment, Department of Public Health, Health Services Research and HTA, UMIT-University for Health Sciences, Medical Informatics and Technology, Hall in Tirol, Austria.<br>Division of Health Technology Assessment, ONCOTYROL - Center for Personalized Cancer Medicine, Innsbruck, Austria. |
| Dr Shaun Haran               | Department of Women's Cancer, Institute for Women's Health, University College London, London, UK.                                                                                                                                                                                                                                                                          |
| Dr Sirpa Heinävaara          | Finnish Cancer Registry, Helsinki, Finland.                                                                                                                                                                                                                                                                                                                                 |
| Ms Valerie Helin             | Predilife, Villejuif, France.                                                                                                                                                                                                                                                                                                                                               |
| Dr Zdenko Herceg             | Epigenetic Group, The International Agency for Research on Cancer (IARC), WHO, Lyon, France.                                                                                                                                                                                                                                                                                |
| Dr Weang-Kee Ho              | School of Mathematical Sciences, Faculty of Science and Engineering, University of Nottingham Malaysia, Selangor, Malaysia.                                                                                                                                                                                                                                                 |
| Dr Miguel de la Hoya         | Molecular Oncology Laboratory CIBERONC, Hospital Clínico San Carlos, IdISSC (Instituto de Investigación Sanitaria del Hospital Clínico San Carlos), Madrid, Spain.                                                                                                                                                                                                          |
| Prof. John Hopper            | Centre for Epidemiology and Biostatistics Research, Breast Cancer Unit, The University of Melbourne, Australia.                                                                                                                                                                                                                                                             |
| Dr Tom Hueting               | Evidencio, Haaksbergen, The Netherlands.                                                                                                                                                                                                                                                                                                                                    |
| Prof. Teo Soo Hwang          | Cancer Research Malaysia, Subang Jaya Medical Centre, Subang Jaya, Selangor, Malaysia.                                                                                                                                                                                                                                                                                      |
| Dr Urška Ivanuš              | Epidemiology and Cancer Registry, Institute of Oncology Ljubljana, Ljubljana, Slovenia.                                                                                                                                                                                                                                                                                     |
| Dr Beate Jahn                | Institute of Public Health, Medical Decision Making and Health Technology Assessment, Department of Public Health, Health Services Research and HTA, UMIT-University for Health Sciences, Medical Informatics and Technology, Hall in Tirol, Austria.                                                                                                                       |
| Dr Katja Jarm                | Epidemiology and Cancer Registry, DORA Registry and Call Center, Institute of Oncology, Ljubljana, Slovenia.                                                                                                                                                                                                                                                                |
| Ms Allison Jones             | Department of Women's Cancer, Institute for Women's Health, University College London, London, UK.                                                                                                                                                                                                                                                                          |
| Dr Susanne Knapp             | Department of Women's Cancer, Institute for Women's Health, University College London, London, UK.                                                                                                                                                                                                                                                                          |
| Ms Mona Knotek-Roggenbauer   | Europa Donna - The European Breast Cancer Coalition, Austria.                                                                                                                                                                                                                                                                                                               |
| Prof. Harry de Koning        | Department of Public Health, Erasmus MC, Rotterdam, The Netherlands.                                                                                                                                                                                                                                                                                                        |
| Dr Mateja Krajc              | Ern Genturis, Institute of Oncology, Ljubljana, Slovenia.                                                                                                                                                                                                                                                                                                                   |
| Dr Ayse G. Kurt              | Department of Obstetrics and Gynecology, Clinic of the Ludwig-Maximilians-University Munich, Germany.                                                                                                                                                                                                                                                                       |
| Dr Anders Kvist              | BioCARE: Biomarkers in Cancer Medicine improving Health Care, Education and Innovation, Lund University, Lund, Sweden.                                                                                                                                                                                                                                                      |
| Dr Olivia Leavy              | Department of Health Sciences, Genetic Epidemiology Group Research, University of Leicester, Leicester, UK.                                                                                                                                                                                                                                                                 |
| Dr Andreas Leimbach          | Eurofins Genomics Europe Sequencing GmbH, Konstanz, Germany.                                                                                                                                                                                                                                                                                                                |
| Dr Fabienne Lesueur          | Institut Curie, Paris, France.                                                                                                                                                                                                                                                                                                                                              |
| Dr Shuai Li                  | Centre for Epidemiology and Biostatistics Research, Breast Cancer Unit, The University of Melbourne, Australia.                                                                                                                                                                                                                                                             |
| Dr Jan-Willem van de Loo     | European Commission, DG Research & Innovation, Unit E2 – Combatting diseases, CDMA 00/170, 1049 Brussels, Belgium.                                                                                                                                                                                                                                                          |
| Dr Sonia Mardinian           | Unicancer, Paris, France.                                                                                                                                                                                                                                                                                                                                                   |
| Prof. Hanne Meijers-Heijboer | Department Of Clinical Genetics, Vu University Medical Center – VUMC, Amsterdam, The Netherlands.                                                                                                                                                                                                                                                                           |
| Prof. Andres Metspalu        | EGCUT - The Estonian Genome Center, University of Tartu, Estonia.                                                                                                                                                                                                                                                                                                           |
| Dr Sandrine de Montgolfier   | IRIS Institute for Interdisciplinary Research on Social Issues, Paris, France.                                                                                                                                                                                                                                                                                              |
| Dr Sowmya Moorthie           | PHG Foundation, Cambridge, UK.                                                                                                                                                                                                                                                                                                                                              |
| Dr Anna Gonzalez Neira       | Human Genotyping Core Unit, National Center for Oncology Research (CNIO), Madrid, Spain.                                                                                                                                                                                                                                                                                    |
| Dr Nuno Nene                 | Department of Women's Cancer, Institute for Women's Health, University College London, London, UK.                                                                                                                                                                                                                                                                          |
| Dr Carolyn Nickson           | Melbourne School of Population and Global Health, The University of Melbourne, Australia.                                                                                                                                                                                                                                                                                   |
| Prof. Håkan Olsson           | BioCARE: Biomarkers in Cancer Medicine improving Health Care, Education and Innovation, Lund University, Lund, Sweden.                                                                                                                                                                                                                                                      |
| Dr Wilhelm Oberaigner        | Institute of Public Health, Medical Decision Making and Health Technology Assessment, Department of Public Health, Health Services Research and HTA, UMIT-University for Health Sciences, Medical Informatics and Technology, Hall in Tirol, Austria.                                                                                                                       |
| Dr Tobias Paprotka           | Eurofins Genomics Europe Sequencing GmbH, Konstanz, Germany.                                                                                                                                                                                                                                                                                                                |
| Prof. Nora Pashayan          | Department of Applied Health Research, Institute of Epidemiology and Healthcare, University College London, UK.                                                                                                                                                                                                                                                             |

|                                |                                                                                                                                                                                                                                                                                                                                                                             |
|--------------------------------|-----------------------------------------------------------------------------------------------------------------------------------------------------------------------------------------------------------------------------------------------------------------------------------------------------------------------------------------------------------------------------|
| Prof. Paul Pharoah             | Centre for Cancer Genetic Epidemiology, Department of Public Health and Primary Care, University of Cambridge, UK.                                                                                                                                                                                                                                                          |
| Dr Margarita Posso             | Department of Epidemiology and Evaluation, IMIM (Hospital del Mar Medical Research Institute), Barcelona, Spain.                                                                                                                                                                                                                                                            |
| Dr Nicolien van Ravesteyn      | Department of Public Health, Erasmus MC, Rotterdam, The Netherlands.                                                                                                                                                                                                                                                                                                        |
| Prof. Gad Rennert              | Carmel Medical Center, Technion, Clalit, Haifa, Israel.                                                                                                                                                                                                                                                                                                                     |
| Dr Beatriz Sobrino Rey         | Universidade de Santiago de Compostela, Santiago de Compostela, Spain.                                                                                                                                                                                                                                                                                                      |
| Mr David Ritchie               | Faculty of Medicine and Health Sciences, University of Antwerp, Antwerp, Belgium.                                                                                                                                                                                                                                                                                           |
| Dr Daniel Roche                | SOPHiA Genetics, Bidart, France.                                                                                                                                                                                                                                                                                                                                            |
| Dr Marta Roman                 | Department of Epidemiology and Evaluation, IMIM (Hospital del Mar Medical Research Institute), Barcelona, Spain.                                                                                                                                                                                                                                                            |
| Dr Atocha Romero               | Department of Medical Oncology, Puerta de Hierro-Majadahonda University Hospital, Madrid, Spain.                                                                                                                                                                                                                                                                            |
| Dr Matti Rookus                | Division Psychosocial Research and Epidemiology, Netherlands Cancer Institute, Antoni van Leeuwenhoek Hospital, Amsterdam, The Netherlands.                                                                                                                                                                                                                                 |
| Dr Paolo Giorgi Rossi          | Epidemiology Service, Azienda USL of Reggio Emilia, IRCCS, Reggio Emilia, Italy.                                                                                                                                                                                                                                                                                            |
| Dr Tytti Sarkeala              | Finnish Cancer Registry, Helsinki, Finland.                                                                                                                                                                                                                                                                                                                                 |
| Dr Marjanka Schmidt            | Department of Molecular Pathology, Netherlands Cancer Institute, Antoni van Leeuwenhoek Hospital, Amsterdam, The Netherlands.                                                                                                                                                                                                                                               |
| Prof. Rita Schmutzler          | Center of Family Breast and Ovarian Cancer, University Hospital Cologne, Cologne, Germany.                                                                                                                                                                                                                                                                                  |
| Prof. Nereo Segnan             | Department of Cancer Screening and Unit of Cancer Epidemiology, Center for Epidemiology and Prevention in Oncology, CPO Piemonte, WHO Collaborative Center for Cancer Early Diagnosis and Screening, Torino, Italy.                                                                                                                                                         |
| Prof. Uwe Siebert              | Institute of Public Health, Medical Decision Making and Health Technology Assessment, Department of Public Health, Health Services Research and HTA, UMIT-University for Health Sciences, Medical Informatics and Technology, Hall in Tirol, Austria.<br>Division of Health Technology Assessment, ONCOTYROL - Center for Personalized Cancer Medicine, Innsbruck, Austria. |
| Prof. Sabine Siesling          | Netherlands Comprehensive Cancer Organisation (IKNL), Department Research and Development, Utrecht, The Netherlands.<br>University of Twente, Technical Medical Centre,<br>Department Health Technology and Services Research, Enschede, The Netherlands.                                                                                                                   |
| Prof. Jacques Simard           | CHU de Québec - Université Laval Research Center, Genomics Center, Québec, Canada.                                                                                                                                                                                                                                                                                          |
| Dr Efrat Slonim                | Assuta Medical Centers, Israel.                                                                                                                                                                                                                                                                                                                                             |
| Prof. Melissa Southey          | Genetic Epidemiology Laboratory (GEL), Department of Pathology, The University of Melbourne, Australia.                                                                                                                                                                                                                                                                     |
| Dr Gaby Sroczynski             | Institute of Public Health, Medical Decision Making and Health Technology Assessment, Department of Public Health, Health Services Research and HTA, UMIT-University for Health Sciences, Medical Informatics and Technology, Hall in Tirol, Austria.<br>Division of Health Technology Assessment, ONCOTYROL - Center for Personalized Cancer Medicine, Innsbruck, Austria. |
| Prof. Ewout Steyerberg         | Department of Public Health, Erasmus MC, Rotterdam, The Netherlands.                                                                                                                                                                                                                                                                                                        |
| Prof. Dominique Stoppa-Lyonnet | Institut Curie, Paris, France.                                                                                                                                                                                                                                                                                                                                              |
| Dr Karin Sundström             | Department of Laboratory Medicine, Karolinska Institutet, Stockholm, Sweden.                                                                                                                                                                                                                                                                                                |
| Dr Francois Taban              | Clinique Générale-Beaulieu, Geneva, Switzerland.                                                                                                                                                                                                                                                                                                                            |
| Dr Marc Tischkowitz            | Department of Medical Genetics, National Institute for Health Research Cambridge Biomedical Research Centre, University of Cambridge, Cambridge, UK.                                                                                                                                                                                                                        |
| Dr Krista Tromp                | Department of Medical Ethics and Philosophy of Medicine, Erasmus MC, Rotterdam, The Netherlands.                                                                                                                                                                                                                                                                            |
| Prof. Clare Turnbull           | Division of Genetics and Epidemiology, Institute Of Cancer Research, London, UK.                                                                                                                                                                                                                                                                                            |
| Dr Lucie Veron                 | Institut Gustave Roussy, Villejuif, France.                                                                                                                                                                                                                                                                                                                                 |
| Dr Benjamin Verret             | Institut Gustave Roussy, Villejuif, France.                                                                                                                                                                                                                                                                                                                                 |
| Dr Cecile Vissac-Sabatier      | French Breast Cancer Intergroup, Unicancer, Paris, France.                                                                                                                                                                                                                                                                                                                  |
| Dr Odette Wegwarth             | Max Planck Institute for Human Development, Center for Adaptive Rationality, Harding Center for Risk Literacy, Berlin, Germany.                                                                                                                                                                                                                                             |
| Prof. Jelle Wesseling          | Division of Molecular Pathology, Netherlands Cancer Institute, Antoni van Leeuwenhoek Hospital, Amsterdam, The Netherlands.                                                                                                                                                                                                                                                 |
| Prof. Martin Widschwendter     | Department of Women's Cancer, Institute for Women's Health, University College London, London, UK.                                                                                                                                                                                                                                                                          |
| Mrs Jiran Vatanekh Atashgah    | Department of Women's Cancer, Institute for Women's Health, University College London, London, UK.                                                                                                                                                                                                                                                                          |
| Dr Maaïke Vreeswijk            | Leiden University Medical Center, Leiden, The Netherlands.                                                                                                                                                                                                                                                                                                                  |
| Dr Maryam Yahiaoui-Doktor      | Institute for Medical Informatics, Statistics and Epidemiology, University of Leipzig, Germany.                                                                                                                                                                                                                                                                             |
